# Supplementary material
Source: publisher figshare collection journal article supplement (https://frontiersin.figshare.com/ndownloader/files/17889449)
Supplement: Supplementary file 1 [file 17889449]

## Supporting Information

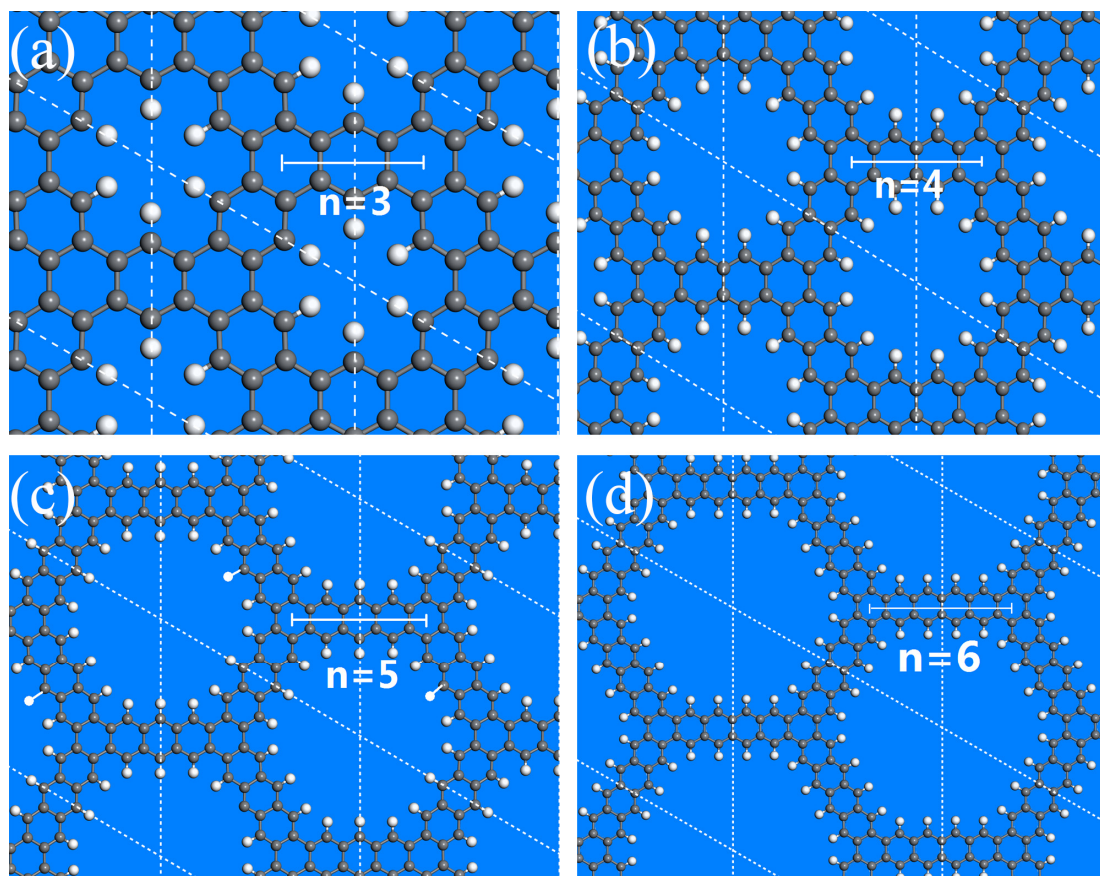

**Fig. S1** The molecular structures of closed conjugated COPs (COP-Bn,  $n=3,4,5,6$ ), (a)COP-B3, (b)COP-B4, (c)COP-B5, (d)COP-B6, the grey atoms stand for carbon atoms, and the white atoms stand for hydrogen atoms.

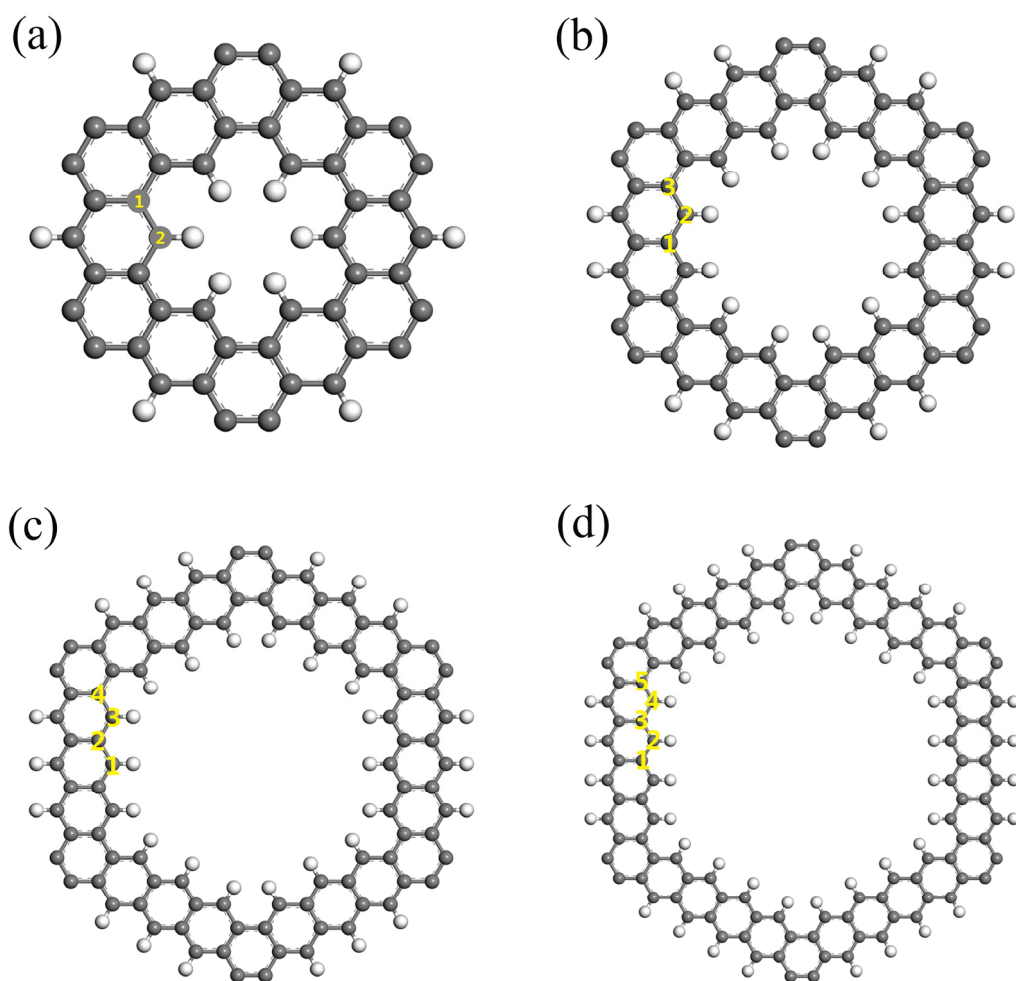

**Fig. S2** The molecular structures and alternative ORR sites of closed conjugated COPs (COP-Bn, n=3,4,5,6), (a)COP-B3, (b)COP-B4, (c)COP-B5, (d)COP-B6, the grey atoms stand for carbon atoms, the white atoms stand for hydrogen atoms, and the yellow numbers stand for sites.

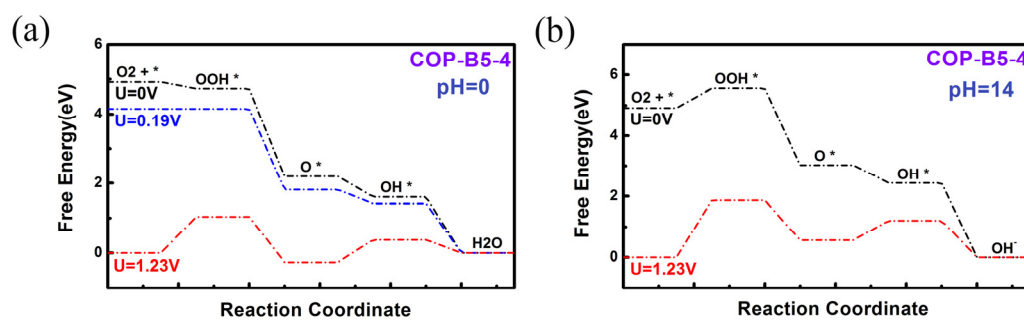

Fig. S3 Free energy curves of COP-B5 (Sites No.4, a, pH=0; b, pH=14)

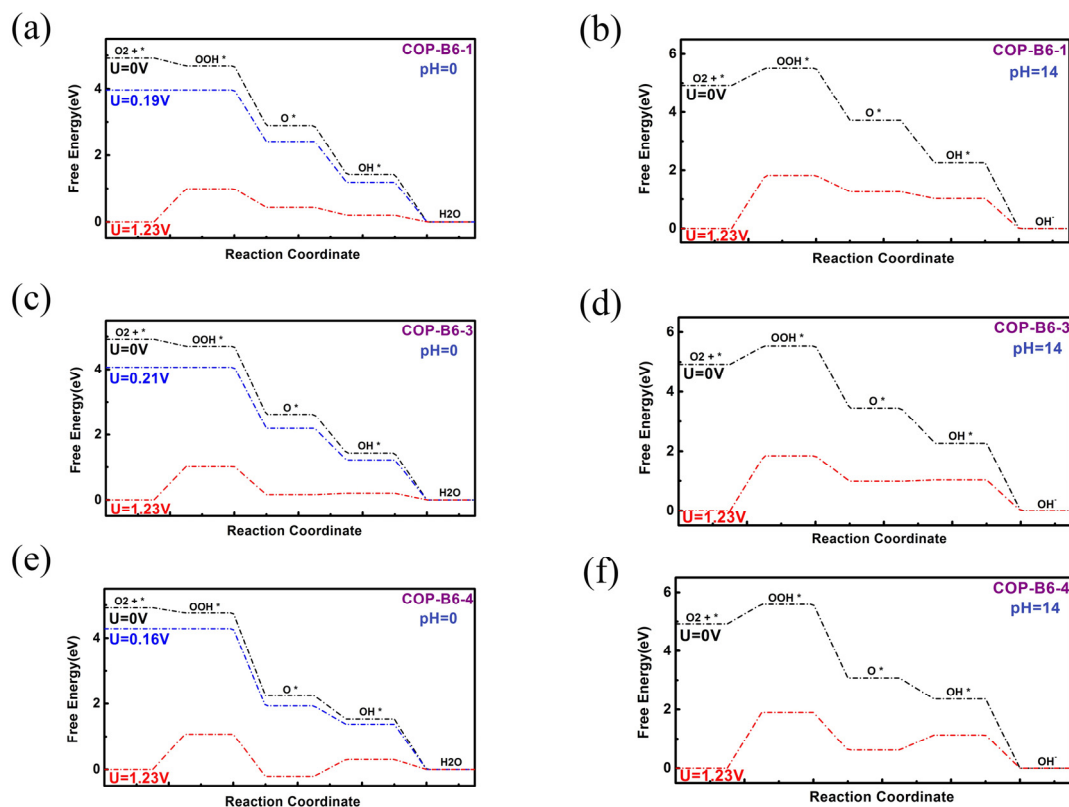

Fig. S4 Free energy curves of COP-B6 (Site No.1, a, pH=0; b, pH=14, Site No.3, c, pH=0; d, pH=14, Site No.4, e, pH=0; f, pH=14)
